# Supplementary material for: Carbonic Anhydrases in Cnidarians: Novel Perspectives from the Octocorallian Corallium rubrum
Source: PLoS One. 2016 Aug 11;11(8):e0160368. doi: 10.1371/journal.pone.0160368 (PMC4981384; doi:10.1371/journal.pone.0160368)
Supplement: S3 Table — The number of amino acid substitutions per site between sequences is shown. Analyses were conducted using the Poisson correction model. The analysis involved 72 amino acid sequences. All positions with less than 95% site coverage were eliminated. That is, fewer than 5% alignment gaps, missing data, and ambiguous bases were allowed at any position. There were a total of 146 positions in the final dataset. Evolutionary analyses were conducted in Mega (V6.0). For CARPs, the best score per column is highlighted in yellow, and the two best scores are in bold. (XLSX) [file pone.0160368.s010.xlsx]

## Sheet: PairwiseDistances
Pairwise distances
Description
Analysis
	Analysis ---------------------- Distance Estimation
	Scope ------------------------- Pairs of taxa
Estimate Variance
	Variance Estimation Method ---- None
Substitution Model
	Substitutions Type ------------ Amino acid
	Model/Method ------------------ Poisson model
Rates and Patterns
	Rates among Sites ------------- Uniform rates
	Pattern among Lineages -------- Same (Homogeneous)
Data Subset to Use
	Gaps/Missing Data Treatment --- Partial deletion
No. of Sites : 146
d : Estimate
	SpiCA7	AmiCA7	SpiCA1	AmiCA6	NveCA4	AelegCarp1	ApaCA7	ApaCA3	ApaCA4	SpiCA4	SpiCA5	AmiCA2	AmiCA5	AmiCA4	AmiCA9	AmiCA10	AmiCA3	SpiCA6	CruCA5	CruCA6	CruCA4	NveCA1	NveCA3	AmiCA1	PausCarp1	FaviaCarp	SpiCA11	NveCA5	AelegCarp2	ApaCA6	CruCA3	NveCA2	ApaCA5	SpiCA3	AmiCA8	HmaCA6	HmaCA7	HmaCA1	HmaCA2	HmaCA3	HmaCA4	HmaCA5	CruCA2	ApaCA8	NveCA7	ApaCA1	ApaCA2	ApaCA9	SpiCA8
SpiCA7	***	0.416	1.483	1.422	1.311	1.508	1.393	1.358	1.452	1.515	1.452	1.515	1.483	1.452	1.422	1.452	1.581	1.483	1.653	1.365	1.548	1.452	1.483	1.617	1.548	1.581	1.653	1.653	1.771	1.653	1.393	1.338	1.365	1.26	1.26	1.515	1.515	1.548	1.311	1.338	1.483	1.515	1.365	1.422	1.393	1.235	1.246	1.285	1.338
AmiCA7	0.416	***	1.497	1.436	1.299	1.698	1.497	1.372	1.497	1.497	1.379	1.497	1.497	1.529	1.436	1.497	1.466	1.562	1.466	1.352	1.562	1.562	1.436	1.596	1.705	1.667	1.744	1.667	1.785	1.562	1.407	1.436	1.379	1.249	1.325	1.631	1.631	1.631	1.466	1.466	1.596	1.529	1.202	1.352	1.379	1.274	1.26	1.249	1.325
SpiCA1	1.483	1.497	***	0.359	0.794	0.757	0.906	0.834	0.923	0.873	0.873	0.906	0.906	0.809	0.856	0.856	0.873	0.906	0.809	0.794	0.779	0.873	0.856	1.133	1.112	1.052	1.092	1.072	1.072	1.052	0.995	0.84	0.84	0.856	0.873	1.133	1.112	1.072	1.013	0.995	1.072	1.052	0.976	1.072	1.112	1.072	1.058	1.092	1.052
AmiCA6	1.422	1.436	0.359	***	0.764	0.818	0.84	0.85	0.873	0.794	0.825	0.794	0.889	0.794	0.825	0.889	0.809	0.873	0.809	0.856	0.809	0.889	0.873	1.092	1.155	1.052	1.072	1.072	1.052	1.052	0.889	0.889	0.84	0.809	0.856	1.052	1.032	0.889	0.889	0.889	0.941	0.958	0.995	0.995	1.072	1.013	1.058	1.052	1.013
NveCA4	1.311	1.299	0.794	0.764	***	0.728	0.707	0.882	0.941	0.873	1.013	0.906	1.052	0.976	0.976	1.052	0.923	0.889	0.856	0.856	0.873	0.84	0.856	1.013	1.032	1.013	0.995	1.155	1.112	1.013	1.032	0.856	0.923	0.941	0.995	1.072	1.052	0.976	0.958	0.976	1.072	1.092	1.072	0.995	1.052	0.906	1.019	0.873	0.856
AelegCarp1	1.508	1.698	0.757	0.818	0.728	***	0.633	0.927	0.934	0.916	0.882	1.025	1.085	0.988	1.006	0.951	0.988	1.025	0.818	0.85	0.951	0.951	0.934	1.17	1.193	1.17	1.239	1.193	1.288	1.263	1.085	1.085	1.006	1.106	1.065	1.045	1.065	1.045	1.127	1.148	1.148	1.148	1.216	1.127	1.239	1.106	1.232	1.17	1.106
ApaCA7	1.393	1.497	0.906	0.84	0.707	0.633	***	0.951	0.923	0.995	0.941	0.976	1.133	1.032	1.052	1.072	0.873	0.906	0.84	0.889	0.906	0.958	1.013	1.072	1.013	1.013	1.052	1.092	1.032	0.995	1.032	0.958	0.958	0.906	0.958	1.032	1.092	1.013	1.013	0.995	1.052	1.092	1.092	1.199	1.222	1.092	1.209	1.032	0.941
ApaCA3	1.358	1.372	0.834	0.85	0.882	0.927	0.951	***	0.686	0.743	0.802	0.757	0.834	0.743	0.714	0.772	0.772	0.916	0.7	0.787	0.866	0.787	0.714	1.17	1.193	1.065	1.216	1.148	1.193	1.127	0.899	0.882	0.951	0.85	0.951	1.065	1.17	1.106	0.988	1.006	1.006	1.025	1.106	1.085	1.17	1.006	0.885	0.899	0.834
ApaCA4	1.452	1.497	0.923	0.873	0.941	0.934	0.923	0.686	***	0.794	0.856	0.779	0.809	0.794	0.721	0.794	0.75	0.856	0.889	0.809	0.923	0.693	0.809	1.072	1.092	1.133	1.072	1.32	1.199	1.133	1.052	0.976	0.84	0.906	0.906	1.032	1.072	1.092	0.976	1.032	0.976	0.995	1.32	1.199	1.072	1.013	1.019	1.013	0.906
SpiCA4	1.515	1.497	0.873	0.794	0.873	0.916	0.995	0.743	0.794	***	0.44	0.484	0.589	0.473	0.451	0.529	0.529	0.529	0.735	0.764	0.809	0.75	0.721	1.222	1.177	1.092	1.133	1.177	1.133	1.199	0.976	0.906	0.809	0.889	0.941	1.072	1.133	1.072	0.995	1.032	1.013	1.052	1.133	1.155	1.072	0.976	1.078	0.958	0.958
SpiCA5	1.452	1.379	0.873	0.825	1.013	0.882	0.941	0.802	0.856	0.44	***	0.506	0.64	0.553	0.484	0.529	0.565	0.602	0.666	0.889	0.889	0.75	0.825	1.27	1.222	1.199	1.27	1.155	1.072	1.112	0.889	0.941	0.825	0.873	0.923	0.923	0.923	0.995	0.825	0.84	0.84	0.873	1.199	1.052	1.112	0.995	1.099	1.013	0.958
AmiCA2	1.515	1.497	0.906	0.794	0.906	1.025	0.976	0.757	0.779	0.484	0.506	***	0.553	0.495	0.451	0.518	0.473	0.565	0.707	0.84	0.825	0.721	0.825	1.222	1.092	1.155	1.112	1.112	1.032	1.092	0.873	0.825	0.825	0.825	0.889	0.995	0.923	1.072	0.941	0.976	0.923	0.941	1.199	1.092	1.052	0.976	1.038	1.072	1.013
AmiCA5	1.483	1.497	0.906	0.889	1.052	1.085	1.133	0.834	0.809	0.589	0.64	0.553	***	0.256	0.247	0.247	0.602	0.666	0.856	0.764	0.779	0.707	0.794	1.199	1.155	1.155	1.246	1.133	1.092	1.133	1.072	0.906	0.906	0.856	0.923	1.133	1.133	1.112	0.995	1.032	1.032	1.052	1.222	1.155	1.032	1.092	1.099	1.177	1.052
AmiCA4	1.452	1.529	0.809	0.794	0.976	0.988	1.032	0.743	0.794	0.473	0.553	0.495	0.256	***	0.18	0.18	0.518	0.614	0.764	0.75	0.75	0.721	0.735	1.133	1.155	1.155	1.199	1.155	1.112	1.112	0.976	0.906	0.856	0.809	0.873	1.133	1.092	1.072	0.941	0.976	1.032	1.032	1.155	1.052	1.052	1.072	1.078	1.032	1.052
AmiCA9	1.422	1.436	0.856	0.825	0.976	1.006	1.052	0.714	0.721	0.451	0.484	0.451	0.247	0.18	***	0.093	0.44	0.518	0.764	0.721	0.794	0.721	0.75	1.112	1.112	1.112	1.177	1.112	1.052	1.052	0.958	0.889	0.873	0.809	0.84	1.155	1.072	1.112	0.958	0.995	1.052	1.052	1.27	1.133	1.052	1.013	1	1.072	0.995
AmiCA10	1.452	1.497	0.856	0.889	1.052	0.951	1.072	0.772	0.794	0.529	0.529	0.518	0.247	0.18	0.093	***	0.495	0.565	0.825	0.666	0.75	0.721	0.764	1.133	1.112	1.112	1.199	1.133	1.032	1.092	0.958	0.941	0.889	0.825	0.856	1.133	1.032	1.155	0.958	0.995	1.052	1.052	1.295	1.177	1.032	1.032	1	1.092	1.013
AmiCA3	1.581	1.466	0.873	0.809	0.923	0.988	0.873	0.772	0.75	0.529	0.565	0.473	0.602	0.518	0.44	0.495	***	0.627	0.75	0.721	0.764	0.764	0.779	1.092	1.032	1.133	1.155	1.112	1.072	1.177	0.941	0.941	0.84	0.794	0.84	1.032	0.941	1.052	0.873	0.906	0.941	0.923	1.27	1.112	1.112	1.032	1.038	1.013	0.906
SpiCA6	1.483	1.562	0.906	0.873	0.889	1.025	0.906	0.916	0.856	0.529	0.602	0.565	0.666	0.614	0.518	0.565	0.627	***	0.825	0.75	0.779	0.75	0.693	1.155	1.177	1.092	1.112	1.112	1.092	1.177	0.856	0.958	0.958	0.941	0.923	1.112	0.995	1.072	1.032	1.052	0.995	0.995	1.246	1.112	1.013	0.976	1.099	1.133	0.995
CruCA5	1.653	1.466	0.809	0.809	0.856	0.818	0.84	0.7	0.889	0.735	0.666	0.707	0.856	0.764	0.764	0.825	0.75	0.825	***	0.693	0.75	0.693	0.779	1.032	1.155	1.072	1.133	1.072	1.052	0.976	0.923	0.906	0.856	0.809	0.889	0.906	0.941	0.873	0.889	0.923	0.941	0.906	1.133	1.092	1.133	0.941	1	0.889	0.906
CruCA6	1.365	1.352	0.794	0.856	0.856	0.85	0.889	0.787	0.809	0.764	0.889	0.84	0.764	0.75	0.721	0.666	0.721	0.75	0.693	***	0.653	0.764	0.764	1.032	1.112	1.052	1.052	1.112	1.133	1.072	0.809	0.873	0.825	0.825	0.794	1.013	1.032	0.976	0.958	0.995	0.923	0.976	1.013	0.995	0.976	0.856	0.927	0.958	0.809
CruCA4	1.548	1.562	0.779	0.809	0.873	0.951	0.906	0.866	0.923	0.809	0.889	0.825	0.779	0.75	0.794	0.75	0.764	0.779	0.75	0.653	***	0.825	0.889	1.052	1.032	1.072	1.112	1.072	0.958	1.013	0.906	0.906	0.735	0.825	0.906	0.958	0.995	0.976	0.941	0.976	0.995	0.976	1.092	1.013	1.155	1.072	1.232	1.072	0.995
NveCA1	1.452	1.562	0.873	0.889	0.84	0.951	0.958	0.787	0.693	0.75	0.75	0.721	0.707	0.721	0.721	0.721	0.764	0.75	0.693	0.764	0.825	***	0.495	1.133	1.155	1.112	1.177	1.112	1.177	1.092	0.906	0.923	0.889	0.923	0.923	0.923	0.995	0.995	0.856	0.906	0.889	0.889	1.092	0.958	0.976	0.958	1.038	1.052	0.906
NveCA3	1.483	1.436	0.856	0.873	0.856	0.934	1.013	0.714	0.809	0.721	0.825	0.825	0.794	0.735	0.75	0.764	0.779	0.693	0.779	0.764	0.889	0.495	***	1.133	1.155	1.133	1.222	1.177	1.177	1.092	0.809	0.976	0.873	0.873	0.873	1.052	0.976	1.052	0.958	1.013	1.032	1.032	1.072	1.032	0.84	0.889	0.927	0.976	0.825
AmiCA1	1.617	1.596	1.133	1.092	1.013	1.17	1.072	1.17	1.072	1.222	1.27	1.222	1.199	1.133	1.112	1.133	1.092	1.155	1.032	1.032	1.052	1.133	1.133	***	0.301	0.339	0.32	0.666	0.614	0.602	0.856	1.072	0.976	0.995	1.032	1.072	1.052	1.032	1.013	1.013	1.052	1.052	1.155	1.052	1.295	1.246	1.332	1.27	1.133
PausCarp1	1.548	1.705	1.112	1.155	1.032	1.193	1.013	1.193	1.092	1.177	1.222	1.092	1.155	1.155	1.112	1.112	1.032	1.177	1.155	1.112	1.032	1.155	1.155	0.301	***	0.265	0.311	0.602	0.565	0.602	0.958	0.995	0.941	0.941	1.032	1.052	1.072	1.112	1.052	1.052	1.133	1.155	1.27	1.133	1.32	1.32	1.281	1.27	1.155
FaviaCarp	1.581	1.667	1.052	1.052	1.013	1.17	1.013	1.065	1.133	1.092	1.199	1.155	1.155	1.155	1.112	1.112	1.133	1.092	1.072	1.052	1.072	1.112	1.133	0.339	0.265	***	0.23	0.553	0.565	0.553	0.889	0.906	1.013	0.941	0.976	0.995	1.072	1.072	1.052	1.032	1.092	1.072	1.155	1.112	1.27	1.295	1.281	1.199	1.133
SpiCA11	1.653	1.744	1.092	1.072	0.995	1.239	1.052	1.216	1.072	1.133	1.27	1.112	1.246	1.199	1.177	1.199	1.155	1.112	1.133	1.052	1.112	1.177	1.222	0.32	0.311	0.23	***	0.693	0.666	0.627	0.976	1.052	1.072	1.072	1.092	1.032	1.052	1.112	1.092	1.092	1.072	1.072	1.155	1.112	1.373	1.32	1.359	1.295	1.177
NveCA5	1.653	1.667	1.072	1.072	1.155	1.193	1.092	1.148	1.32	1.177	1.155	1.112	1.133	1.155	1.112	1.133	1.112	1.112	1.072	1.112	1.072	1.112	1.177	0.666	0.602	0.553	0.693	***	0.44	0.529	0.906	1.032	0.889	0.976	0.976	0.976	1.092	1.092	1.072	1.072	0.995	0.995	1.112	0.976	1.32	1.246	1.386	1.346	1.177
AelegCarp2	1.771	1.785	1.072	1.052	1.112	1.288	1.032	1.193	1.199	1.133	1.072	1.032	1.092	1.112	1.052	1.032	1.072	1.092	1.052	1.133	0.958	1.177	1.177	0.614	0.565	0.565	0.666	0.44	***	0.378	0.906	1.032	0.958	0.941	0.941	1.112	1.092	1.112	1.112	1.112	1.133	1.112	1.199	1.092	1.246	1.246	1.306	1.27	1.112
ApaCA6	1.653	1.562	1.052	1.052	1.013	1.263	0.995	1.127	1.133	1.199	1.112	1.092	1.133	1.112	1.052	1.092	1.177	1.177	0.976	1.072	1.013	1.092	1.092	0.602	0.602	0.553	0.627	0.529	0.378	***	0.825	0.976	0.906	0.906	0.873	1.112	1.133	0.958	1.032	1.032	1.052	1.013	1.133	0.958	1.222	1.222	1.332	1.246	1.072
CruCA3	1.393	1.407	0.995	0.889	1.032	1.085	1.032	0.899	1.052	0.976	0.889	0.873	1.072	0.976	0.958	0.958	0.941	0.856	0.923	0.809	0.906	0.906	0.809	0.856	0.958	0.889	0.976	0.906	0.906	0.825	***	0.825	0.779	0.614	0.627	0.889	0.906	0.856	0.923	0.923	0.873	0.825	1.052	1.032	0.958	0.923	0.927	0.856	0.889
NveCA2	1.338	1.436	0.84	0.889	0.856	1.085	0.958	0.882	0.976	0.906	0.941	0.825	0.906	0.906	0.889	0.941	0.941	0.958	0.906	0.873	0.906	0.923	0.976	1.072	0.995	0.906	1.052	1.032	1.032	0.976	0.825	***	0.794	0.64	0.602	0.976	1.032	0.84	0.941	0.923	0.906	0.906	0.941	0.941	0.889	0.856	0.892	0.809	0.889
ApaCA5	1.365	1.379	0.84	0.84	0.923	1.006	0.958	0.951	0.84	0.809	0.825	0.825	0.906	0.856	0.873	0.889	0.84	0.958	0.856	0.825	0.735	0.889	0.873	0.976	0.941	1.013	1.072	0.889	0.958	0.906	0.779	0.794	***	0.627	0.68	0.889	0.958	0.923	0.923	0.941	0.889	0.889	1.032	1.052	1.032	0.873	0.962	0.906	0.889
SpiCA3	1.26	1.249	0.856	0.809	0.941	1.106	0.906	0.85	0.906	0.889	0.873	0.825	0.856	0.809	0.809	0.825	0.794	0.941	0.809	0.825	0.825	0.923	0.873	0.995	0.941	0.941	1.072	0.976	0.941	0.906	0.614	0.64	0.627	***	0.239	0.923	0.923	0.873	0.906	0.889	0.923	0.889	1.155	1.013	0.958	0.906	0.981	0.958	0.873
AmiCA8	1.26	1.325	0.873	0.856	0.995	1.065	0.958	0.951	0.906	0.941	0.923	0.889	0.923	0.873	0.84	0.856	0.84	0.923	0.889	0.794	0.906	0.923	0.873	1.032	1.032	0.976	1.092	0.976	0.941	0.873	0.627	0.602	0.68	0.239	***	0.941	0.889	0.856	0.923	0.906	0.941	0.906	1.155	0.976	0.923	0.906	0.962	0.873	0.873
HmaCA6	1.515	1.631	1.133	1.052	1.072	1.045	1.032	1.065	1.032	1.072	0.923	0.995	1.133	1.133	1.155	1.133	1.032	1.112	0.906	1.013	0.958	0.923	1.052	1.072	1.052	0.995	1.032	0.976	1.112	1.112	0.889	0.976	0.889	0.923	0.941	***	0.23	0.589	0.484	0.506	0.473	0.462	1.246	1.092	1.155	1.133	1.209	1.155	1.032
HmaCA7	1.515	1.631	1.112	1.032	1.052	1.065	1.092	1.17	1.072	1.133	0.923	0.923	1.133	1.092	1.072	1.032	0.941	0.995	0.941	1.032	0.995	0.995	0.976	1.052	1.072	1.072	1.052	1.092	1.092	1.133	0.906	1.032	0.958	0.923	0.889	0.23	***	0.577	0.451	0.451	0.495	0.462	1.295	1.032	1.133	1.092	1.12	1.177	1.052
HmaCA1	1.548	1.631	1.072	0.889	0.976	1.045	1.013	1.106	1.092	1.072	0.995	1.072	1.112	1.072	1.112	1.155	1.052	1.072	0.873	0.976	0.976	0.995	1.052	1.032	1.112	1.072	1.112	1.092	1.112	0.958	0.856	0.84	0.923	0.873	0.856	0.589	0.577	***	0.506	0.484	0.44	0.473	1.199	1.032	1.112	1.133	1.209	1.032	0.976
HmaCA2	1.311	1.466	1.013	0.889	0.958	1.127	1.013	0.988	0.976	0.995	0.825	0.941	0.995	0.941	0.958	0.958	0.873	1.032	0.889	0.958	0.941	0.856	0.958	1.013	1.052	1.052	1.092	1.072	1.112	1.032	0.923	0.941	0.923	0.906	0.923	0.484	0.451	0.506	***	0.042	0.23	0.265	1.246	0.976	1.177	1.112	1.163	1.112	1.013
HmaCA3	1.338	1.466	0.995	0.889	0.976	1.148	0.995	1.006	1.032	1.032	0.84	0.976	1.032	0.976	0.995	0.995	0.906	1.052	0.923	0.995	0.976	0.906	1.013	1.013	1.052	1.032	1.092	1.072	1.112	1.032	0.923	0.923	0.941	0.889	0.906	0.506	0.451	0.484	0.042	***	0.213	0.247	1.246	0.995	1.177	1.112	1.163	1.092	0.995
HmaCA4	1.483	1.596	1.072	0.941	1.072	1.148	1.052	1.006	0.976	1.013	0.84	0.923	1.032	1.032	1.052	1.052	0.941	0.995	0.941	0.923	0.995	0.889	1.032	1.052	1.133	1.092	1.072	0.995	1.133	1.052	0.873	0.906	0.889	0.923	0.941	0.473	0.495	0.44	0.23	0.213	***	0.116	1.246	1.013	1.092	1.133	1.186	1.155	0.976
HmaCA5	1.515	1.529	1.052	0.958	1.092	1.148	1.092	1.025	0.995	1.052	0.873	0.941	1.052	1.032	1.052	1.052	0.923	0.995	0.906	0.976	0.976	0.889	1.032	1.052	1.155	1.072	1.072	0.995	1.112	1.013	0.825	0.906	0.889	0.889	0.906	0.462	0.462	0.473	0.265	0.247	0.116	***	1.222	0.995	1.092	1.112	1.186	1.072	0.958
CruCA2	1.365	1.202	0.976	0.995	1.072	1.216	1.092	1.106	1.32	1.133	1.199	1.199	1.222	1.155	1.27	1.295	1.27	1.246	1.133	1.013	1.092	1.092	1.072	1.155	1.27	1.155	1.155	1.112	1.199	1.133	1.052	0.941	1.032	1.155	1.155	1.246	1.295	1.199	1.246	1.246	1.246	1.222	***	0.825	0.856	0.825	0.875	0.889	0.906
ApaCA8	1.422	1.352	1.072	0.995	0.995	1.127	1.199	1.085	1.199	1.155	1.052	1.092	1.155	1.052	1.133	1.177	1.112	1.112	1.092	0.995	1.013	0.958	1.032	1.052	1.133	1.112	1.112	0.976	1.092	0.958	1.032	0.941	1.052	1.013	0.976	1.092	1.032	1.032	0.976	0.995	1.013	0.995	0.825	***	0.906	0.923	1.078	0.941	0.941
NveCA7	1.393	1.379	1.112	1.072	1.052	1.239	1.222	1.17	1.072	1.072	1.112	1.052	1.032	1.052	1.052	1.032	1.112	1.013	1.133	0.976	1.155	0.976	0.84	1.295	1.32	1.27	1.373	1.32	1.246	1.222	0.958	0.889	1.032	0.958	0.923	1.155	1.133	1.112	1.177	1.177	1.092	1.092	0.856	0.906	***	0.64	0.613	0.693	0.589
ApaCA1	1.235	1.274	1.072	1.013	0.906	1.106	1.092	1.006	1.013	0.976	0.995	0.976	1.092	1.072	1.013	1.032	1.032	0.976	0.941	0.856	1.072	0.958	0.889	1.246	1.32	1.295	1.32	1.246	1.246	1.222	0.923	0.856	0.873	0.906	0.906	1.133	1.092	1.133	1.112	1.112	1.133	1.112	0.825	0.923	0.64	***	0.395	0.506	0.565
ApaCA2	1.246	1.26	1.058	1.058	1.019	1.232	1.209	0.885	1.019	1.078	1.099	1.038	1.099	1.078	1	1	1.038	1.099	1	0.927	1.232	1.038	0.927	1.332	1.281	1.281	1.359	1.386	1.306	1.332	0.927	0.892	0.962	0.981	0.962	1.209	1.12	1.209	1.163	1.163	1.186	1.186	0.875	1.078	0.613	0.395	***	0.527	0.575
ApaCA9	1.285	1.249	1.092	1.052	0.873	1.17	1.032	0.899	1.013	0.958	1.013	1.072	1.177	1.032	1.072	1.092	1.013	1.133	0.889	0.958	1.072	1.052	0.976	1.27	1.27	1.199	1.295	1.346	1.27	1.246	0.856	0.809	0.906	0.958	0.873	1.155	1.177	1.032	1.112	1.092	1.155	1.072	0.889	0.941	0.693	0.506	0.527	***	0.693
SpiCA8	1.338	1.325	1.052	1.013	0.856	1.106	0.941	0.834	0.906	0.958	0.958	1.013	1.052	1.052	0.995	1.013	0.906	0.995	0.906	0.809	0.995	0.906	0.825	1.133	1.155	1.133	1.177	1.177	1.112	1.072	0.889	0.889	0.889	0.873	0.873	1.032	1.052	0.976	1.013	0.995	0.976	0.958	0.906	0.941	0.589	0.565	0.575	0.693	***
SpiCA12	1.415	1.436	0.934	0.988	0.882	1.12	1.045	0.962	1.106	0.951	0.934	0.969	1.045	1.025	1.006	1.006	0.916	0.882	0.969	0.866	0.951	0.882	0.818	1.17	1.085	1.106	1.193	1.127	1.006	1.148	0.916	1.025	0.899	0.969	0.899	1.025	0.882	1.025	1.006	1.025	1.025	1.045	0.951	0.934	0.659	0.714	0.7	0.714	0.466
SpiCA13	1.338	1.325	1.032	1.112	0.941	1.216	1.133	1.045	1.155	1.092	1.092	1.112	1.052	1.052	1.092	1.133	1.032	1.112	1.072	1.052	1.072	0.976	1.013	1.246	1.32	1.246	1.346	1.27	1.177	1.222	0.995	1.013	0.923	1.112	1.052	1.199	1.177	0.995	1.072	1.092	1.133	1.155	0.958	0.941	0.809	0.666	0.679	0.666	0.653
SpiCA14	1.365	1.325	1.112	1.199	0.941	1.239	1.177	1.127	1.177	1.112	1.177	1.199	1.199	1.155	1.246	1.222	1.092	1.199	1.032	1.052	1.155	1.092	1.052	1.155	1.246	1.246	1.27	1.32	1.222	1.199	0.995	0.995	1.052	1.032	1.013	1.177	1.246	1.032	1.133	1.155	1.199	1.177	1.013	0.976	0.825	0.75	0.827	0.75	0.735
SpiCA10	1.285	1.436	0.976	0.958	0.923	1.106	0.995	1.006	0.906	1.112	1.112	0.941	1.013	0.923	1.013	0.976	1.112	1.112	1.052	0.906	1.032	0.889	0.889	1.112	1.155	1.112	1.133	1.092	1.032	1.052	1.052	1.072	0.958	0.958	0.958	1.072	1.013	1.133	0.958	0.958	1.072	1.052	0.84	0.856	0.856	0.825	0.875	0.906	0.75
SpiCA9	1.311	1.407	0.941	1.032	0.958	1.025	1.133	1.006	0.995	1.013	1.013	0.941	0.995	0.958	0.941	0.889	1.052	0.958	0.941	0.84	1.092	0.856	0.809	1.133	1.092	1.052	1.133	1.092	1.052	1.052	1.013	0.889	0.856	0.995	0.923	1.072	1.032	1.092	1.133	1.133	1.052	1.052	0.889	0.809	0.75	0.721	0.721	0.779	0.764
SpiCA2	1.142	1.202	0.84	0.779	0.779	0.934	0.889	0.934	0.958	0.75	0.906	0.856	0.923	0.84	0.923	0.958	0.873	0.856	0.873	0.735	0.856	0.825	0.825	1.112	1.112	1.013	1.052	1.032	1.092	1.092	0.958	0.809	0.794	0.906	0.873	0.873	0.958	0.906	0.941	0.941	0.906	0.923	0.735	0.825	0.735	0.779	0.795	0.764	0.653
SpiCA16	1.311	1.274	1.032	1.133	0.976	1.045	1.032	1.127	0.976	1.092	1.092	1.112	1.155	1.112	1.072	1.072	1.032	0.995	1.092	0.941	1.052	0.995	0.976	1.222	1.346	1.27	1.177	1.295	1.177	1.199	1.092	1.013	1.052	1.155	1.032	1.032	1.032	1.112	0.995	0.995	1.072	1.032	0.856	0.906	0.825	0.923	0.909	0.873	0.941
PausCarp2	1.405	1.281	1.276	1.276	1.154	1.063	1.183	1.299	1.154	1.154	1.099	1.183	1.276	1.342	1.213	1.244	1.244	1.154	1.046	1.099	1.213	1.276	1.154	1.491	1.451	1.414	1.491	1.308	1.213	1.276	1.276	1.046	1.213	1.213	1.126	1.183	1.213	1.276	1.154	1.183	1.244	1.183	1.021	1.183	0.948	0.972	0.93	0.925	0.903
NveCA6	1.792	1.54	1.202	1.202	1.225	1.242	1.249	1.242	1.379	1.225	1.225	1.274	1.325	1.225	1.299	1.274	1.249	1.299	1.113	1.249	1.113	1.225	1.225	1.092	1.134	1.051	1.179	1.249	1.134	1.071	1.134	1.202	1.249	1.202	1.299	1.249	1.352	1.352	1.274	1.274	1.379	1.325	1.071	1.071	1.051	1.071	1.017	0.885	1.071
PdamCarp	1.211	1.163	1.161	0.984	0.984	1.088	1.04	1.059	0.932	1.012	1.012	1.069	1.161	1.012	1.012	1.069	0.906	1.099	1.012	0.932	1.194	1.012	1.069	1.129	1.161	1.263	1.228	1.194	1.263	1.069	0.958	1.069	1.04	0.906	1.04	1.129	1.099	1.129	1.012	1.069	1.012	0.984	0.958	0.932	0.834	0.745	0.814	0.834	0.766
SpiCA15	1.235	1.202	1.032	0.889	0.941	1.065	1.032	1.006	0.889	0.995	1.052	1.032	1.092	1.032	1.013	1.092	0.873	1.032	0.995	0.84	0.995	0.923	0.941	1.112	1.177	1.222	1.222	1.246	1.27	1.112	0.976	1.032	0.958	0.958	1.052	1.092	1.112	1.112	1.052	1.112	1.052	1.032	0.958	0.906	0.825	0.764	0.859	0.873	0.779
ApaCA10	1.253	1.429	1.106	1.065	0.951	1.12	1.085	1.078	1.148	1.045	1.006	1.045	1.17	1.065	1.045	1.085	1.148	1.085	1.045	1.106	1.17	1.106	0.969	1.239	1.239	1.085	1.263	1.045	1.148	1.127	1.085	0.866	1.148	1.065	1.006	1.193	1.148	1.127	1.148	1.106	1.148	1.106	0.899	0.818	0.916	0.834	0.937	0.772	0.882
CruCA1	1.858	1.744	0.923	0.923	0.889	0.866	0.923	1.006	1.072	1.013	1.013	1.013	1.246	1.133	1.072	1.092	0.941	1.072	0.941	0.941	1.052	1.072	1.072	1.27	1.199	1.155	1.177	1.112	1.199	1.27	0.995	0.995	0.923	0.923	0.856	1.155	1.177	1.112	1.222	1.222	1.133	1.133	1.092	1.032	1.112	1.052	1.099	1.013	0.995
HmaCA10	1.73	1.827	0.889	0.906	0.923	1.085	1.052	1.025	1.199	1.155	1.072	1.199	1.295	1.177	1.177	1.199	1.155	1.155	1.032	1.013	1.155	1.072	1.052	1.155	1.246	1.112	1.199	1.092	1.112	1.133	0.941	0.976	1.112	1.013	0.976	1.013	1.052	1.013	1.072	1.052	1.133	1.092	1.222	0.995	1.177	1.199	1.186	1.052	1.032
HmaCA8	1.617	1.785	0.941	0.906	0.958	1.065	1.013	1.045	1.072	1.052	1.072	1.133	1.32	1.199	1.199	1.246	1.133	1.199	1.112	1.052	1.155	1.112	1.013	1.222	1.155	1.092	1.155	1.246	1.052	1.072	0.958	0.958	0.976	0.976	0.995	1.112	1.112	1.199	1.133	1.133	1.155	1.155	1.246	1.112	1.199	1.032	1.141	1.072	0.976
HmaCA9	1.617	1.705	0.958	0.889	1.072	1.263	1.222	1.025	1.155	1.112	1.072	1.199	1.27	1.133	1.155	1.199	1.199	1.199	1.177	1.199	1.222	1.177	1.177	1.199	1.222	1.155	1.222	1.295	1.155	1.155	1.032	1.032	1.032	1.013	1.072	1.246	1.199	1.177	1.177	1.155	1.222	1.199	1.27	1.199	1.199	1.133	1.186	1.112	1.133
Nostoc	1.417	1.371	0.86	0.86	1.028	1.041	0.95	0.913	1.091	0.931	1.008	0.913	1.049	0.988	0.931	0.95	1.008	1.049	0.913	0.842	0.895	0.969	0.895	1.231	1.159	1.07	1.231	1.091	1.136	1.07	0.842	0.877	0.826	0.761	0.777	1.091	1.049	1.091	1.091	1.07	1.113	1.091	1.159	1.136	1.07	0.95	0.973	0.969	0.95
HmaCA11	1.602	1.548	0.962	1.078	1.019	0.993	1.078	1.092	1.232	0.962	1.019	1.058	1.058	1	1	1	0.981	1.12	0.962	1	0.944	1.058	0.927	0.981	1.12	1	1.078	1.019	1.019	1	0.962	1.019	1.038	0.944	1.019	1.099	1.058	1.186	1.12	1.099	1.12	1.12	0.981	1.019	0.927	0.944	0.93	0.981	0.892
HmaCA12	1.932	1.806	1.325	1.379	1.379	1.242	1.325	1.318	1.596	1.325	1.299	1.466	1.562	1.325	1.407	1.407	1.379	1.436	1.179	1.407	1.352	1.436	1.299	1.407	1.529	1.352	1.436	1.325	1.274	1.352	1.407	1.352	1.466	1.466	1.466	1.596	1.631	1.529	1.407	1.407	1.497	1.466	1.299	1.249	1.179	1.225	1.235	1.113	1.134
HmaCA15	1.764	1.66	1.025	1.006	1.045	1.12	1.045	1.281	1.106	1.065	1.106	1.193	1.239	1.127	1.106	1.148	1.085	1.216	1.045	1.025	1.025	1.17	1.17	1.065	1.106	1.127	1.127	1.127	1.127	1.106	1.193	1.193	1.127	1.106	1.216	1.263	1.263	1.045	1.085	1.065	1.17	1.17	1.106	1.025	1.148	1.006	1.134	1.045	0.969
HmaCA14	1.574	1.843	1.218	1.127	1.005	1.099	1.005	1.285	1.024	1.195	1.372	1.242	1.372	1.292	1.242	1.292	1.172	1.195	1.149	1.149	1.106	1.195	1.172	1.149	1.195	1.195	1.106	1.218	1.149	1.106	1.318	1.267	1.172	1.242	1.242	1.242	1.267	1.242	1.242	1.242	1.292	1.318	1.218	1.172	1.292	1.127	1.228	1.127	1.127
HmaCA16	1.58	1.514	1.191	1.099	1.191	1.159	1.014	1.181	1.099	1.159	1.191	1.041	1.258	1.293	1.293	1.329	1.128	1.329	1.159	1.258	1.224	1.224	1.224	1.159	1.258	1.224	1.191	1.191	1.159	1.099	1.293	1.191	1.159	1.258	1.329	1.191	1.329	1.159	1.159	1.191	1.041	1.099	1.128	1.099	1.191	1.191	1.367	1.258	1.191
HmaCA13	1.86	1.946	1.131	1.038	1.181	1.123	1.107	1.261	1.181	0.973	1.016	1.06	1.107	1.016	1.038	1.038	1.038	1.107	1.155	1.06	1.038	1.06	1.06	1.261	1.233	1.155	1.233	1.233	1.181	1.155	1.107	1.233	0.994	1.06	1.155	1.289	1.233	1.378	1.233	1.289	1.261	1.261	1.06	1.107	1.06	1.06	1.165	1.083	1.131
	SpiCA7	AmiCA7	SpiCA1	AmiCA6	NveCA4	AelegCarp1	ApaCA7	ApaCA3	ApaCA4	SpiCA4	SpiCA5	AmiCA2	AmiCA5	AmiCA4	AmiCA9	AmiCA10	AmiCA3	SpiCA6	CruCA5	CruCA6	CruCA4	NveCA1	NveCA3	AmiCA1	PausCarp1	FaviaCarp	SpiCA11	NveCA5	AelegCarp2	ApaCA6	CruCA3	NveCA2	ApaCA5	SpiCA3	AmiCA8	HmaCA6	HmaCA7	HmaCA1	HmaCA2	HmaCA3	HmaCA4	HmaCA5	CruCA2	ApaCA8	NveCA7	ApaCA1	ApaCA2	ApaCA9	SpiCA8
[truncated: 24 more columns]
